# Supplementary material
Source: PubMed Central journal article supplement (PMC2804872)
Supplement: NIHMS155731-supplement-1_si_001.pdf [file NIHMS155731-supplement-1_si_001.pdf]

**Supporting Information**

**Impact of hydrogel nanoparticle size and functionalization on in vivo behavior  
for lung imaging and therapeutics**

*Yongjian Liu<sup>1,4</sup>, Aida Ibricevic Richardson<sup>2,4</sup>, Joel A. Cohen<sup>3,4</sup>, Jessica L. Cohen<sup>3</sup>, Sean P. Gunsten<sup>2</sup>,  
Jean M. J. Fréchet<sup>3</sup>, Michael J. Walter<sup>2</sup>, Michael J. Welch<sup>1</sup>, and Steven L. Brody<sup>2,\*</sup>*

Departments of Radiology<sup>1</sup> and Internal Medicine<sup>2</sup>, Washington University School of Medicine, St.  
Louis, MO 63110, and College of Chemistry<sup>3</sup>, University of California, Berkeley, CA, 94720

Running Title: Lung delivery of functionalized hydrogel particles

\* Address correspondence to: Steven L. Brody, Box 8052, Washington University School of Medicine,  
660 South Euclid Avenue, St. Louis, MO 63110, USA; Phone: (314) 362-8969; Fax (314) 362-8987,  
E-mail: brodys@wustl.edu

<sup>4</sup>These authors contributed equally to this work.

**Synthesis of N-acryloyltyramine.** Tyramine (0.5 g, 3.64 mmol, 1 eq.) dissolved in N,N-dimethylformamide (15 mL) was added to a dried flask purged with dry nitrogen. Triethylamine (0.41 g, 4.01 mmol, 1.1 eq.) was added, and the flask was placed in an ice-water bath. Acryloyl chloride (0.31 g, 3.46 mmol, 0.95 eq.) was mixed with N,N-dimethylformamide (10 mL), and added dropwise to the tyramine solution. After 5 min, the flask was removed from the bath and was allowed to stir for an additional 1 h at rt. The reaction mixture was passed through a 0.2  $\mu\text{m}$  PTFE syringe filter to remove the precipitate, and the solvent was removed by rotary evaporation. The resulting clear, brown residue was dissolved in ethyl acetate (90 mL) and washed with PBS (3 x 30 mL). The organic layer was dried over  $\text{MgSO}_4$ , filtered, and the solvent was evaporated. The crude product was further purified by silica gel chromatography using a gradient from 3:1 to 1:3 hexane:ethyl acetate as the eluent. The product (0.42 g, 2.20 mmol, 63% yield) obtained was a white solid. Spectroscopic data was consistent with that previously reported by Bentolila, *et al.*<sup>1</sup>

#### LITERATURE CITED

1. Bentolila, A.; Vlodaysky, I.; Ishai-Michaeli, R.; Kovalchuk, O.; Haloun, C.; Domb, A. J., Poly(N-acryl amino acids): a new class of biologically active polyanions. *J. Med. Chem.* **2000**, 43, (13), 2591-600.
